# Supplementary material for: The influence of mixing on the stratospheric age of air changes in the 21st century
Source: Copernicus journal article supplement (doi:10.5194/acp-19-921-2019), 2019-01-24
Supplement: Supplementary file 1 [file acp-19-921-2019-supplement.pdf]

Supplement of Atmos. Chem. Phys., 19, 921–940, 2019  
<https://doi.org/10.5194/acp-19-921-2019-supplement>  
© Author(s) 2019. This work is distributed under  
the Creative Commons Attribution 4.0 License.

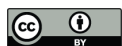

*Supplement of*

## **The influence of mixing on the stratospheric age of air changes in the 21st century**

**Roland Eichinger et al.**

*Correspondence to:* Roland Eichinger (roland.eichinger@dlr.de)

The copyright of individual parts of the supplement might differ from the CC BY 4.0 License.

## 1 Introduction

This supplement contains additional material to the article “*The influence of mixing on the stratospheric age of air changes in the 21st century*”. We provide additional figures for Sect. 3.4 of the paper. In the main article, the multi-model-means of the zonal wind  $\bar{u}$ , the Eliassen-Palm flux divergence, the meridional residual circulation  $v^*$ , the meridional PV-gradient ( $\partial PV/\partial y$ ), the diffusivity coefficient  $K_{yy}$  and the ratio  $K_{yy}/|v^*|$  of eight model simulations are presented. Here, we show these quantities for each of the eight CCMI-1 (Chemistry Climate Model Intercomparison project) REF-C2 model simulations individually. The models that were used in this analysis are ACCESS, CMAM, EMAC-L47, EMAC-L90, GEOSCCM, MRI, NIWA-UKCA and WACCM. For more information on these models, the simulation setup and the selection of the models, see main article.

## 10 2 Additional figures

# ACCESS

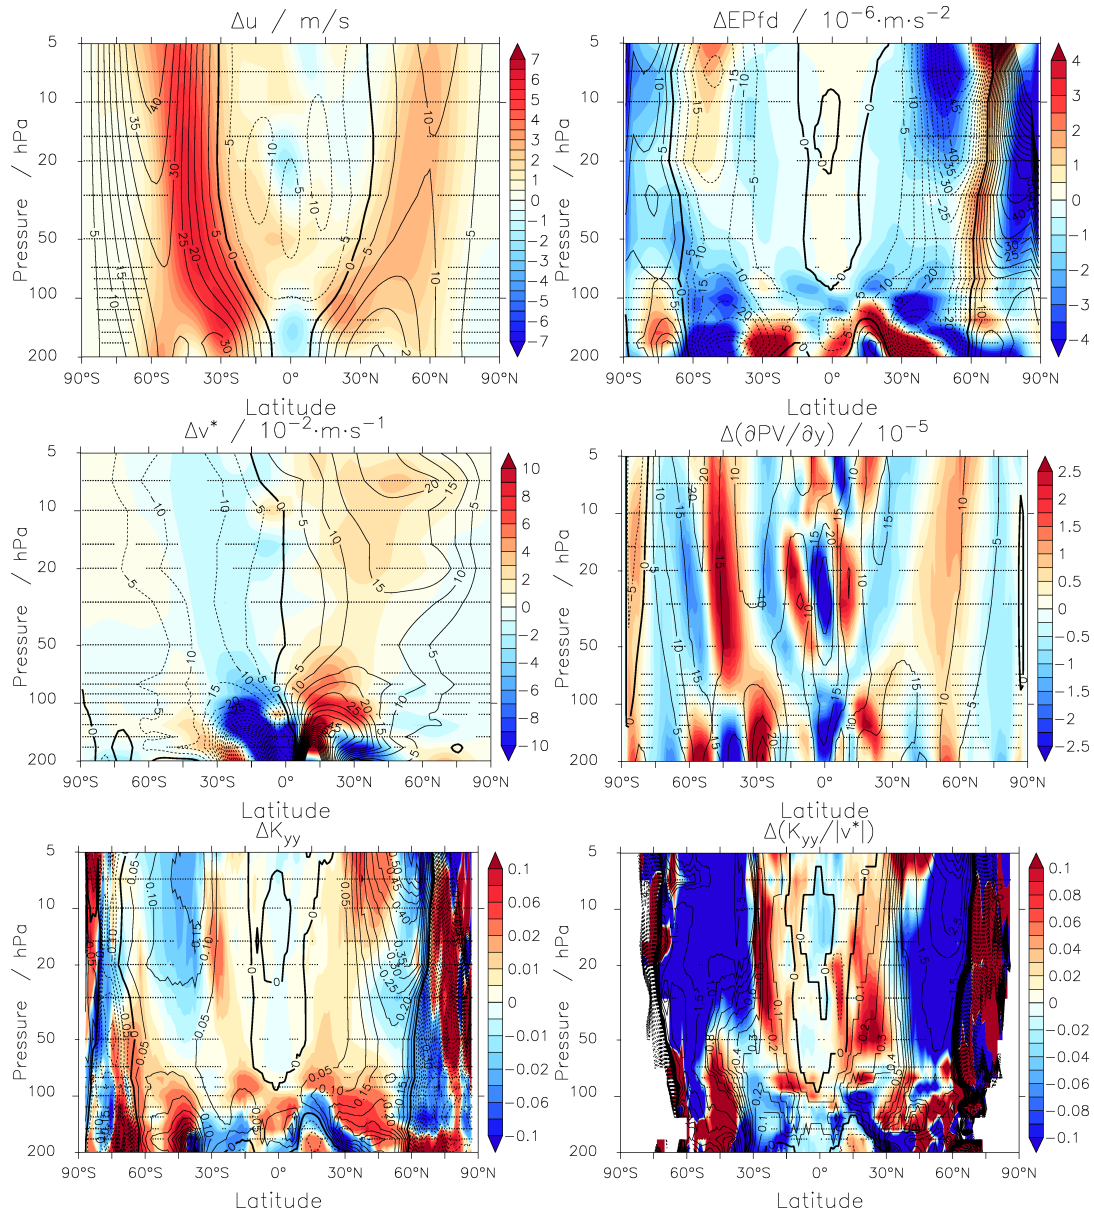

**Figure 1.** ACCESS CCM1 REF-C2 model simulation differences ( $\Delta$ ) of (a) the zonal wind  $\bar{u}$ , (b) the EP flux divergence, (c) the meridional residual circulation  $v^*$ , (d) the meridional PV-gradient ( $\partial PV/\partial y$ ), (e) the diffusivity coefficient  $K_{yy}$  and (f) the ratio  $K_{yy}/|v^*|$  between the periods 1970-1990 and 2080-2100. The contour lines show the multi-model mean climatology of the first period of the respective quantity. Stippled regions show where the statistical significance of the difference is below the threshold 95%.

# CMAM

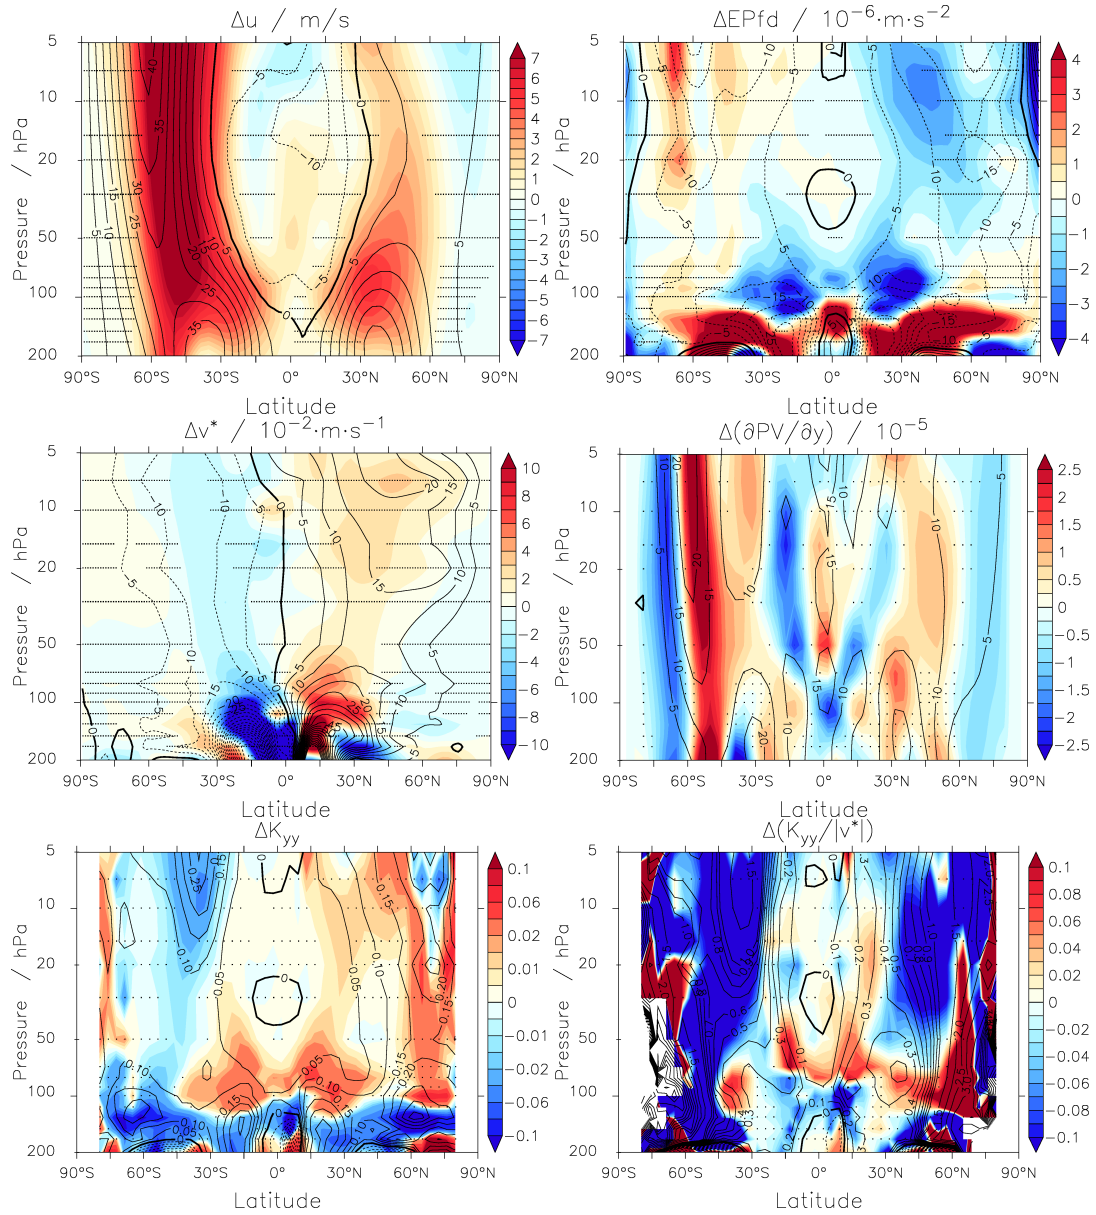

**Figure 2.** CMAM CCM1 REF-C2 model simulation differences ( $\Delta$ ) of (a) the zonal wind  $\bar{u}$ , (b) the EP flux divergence, (c) the meridional residual circulation  $v^*$ , (d) the meridional PV-gradient ( $\partial PV/\partial y$ ), (e) the diffusivity coefficient  $K_{yy}$  and (f) the ratio  $K_{yy}/|v^*|$  between the periods 1970-1990 and 2080-2100. The contour lines show the multi-model mean climatology of the first period of the respective quantity. Stippled regions show where the statistical significance of the difference is below the threshold 95%.

# EMAC-L47

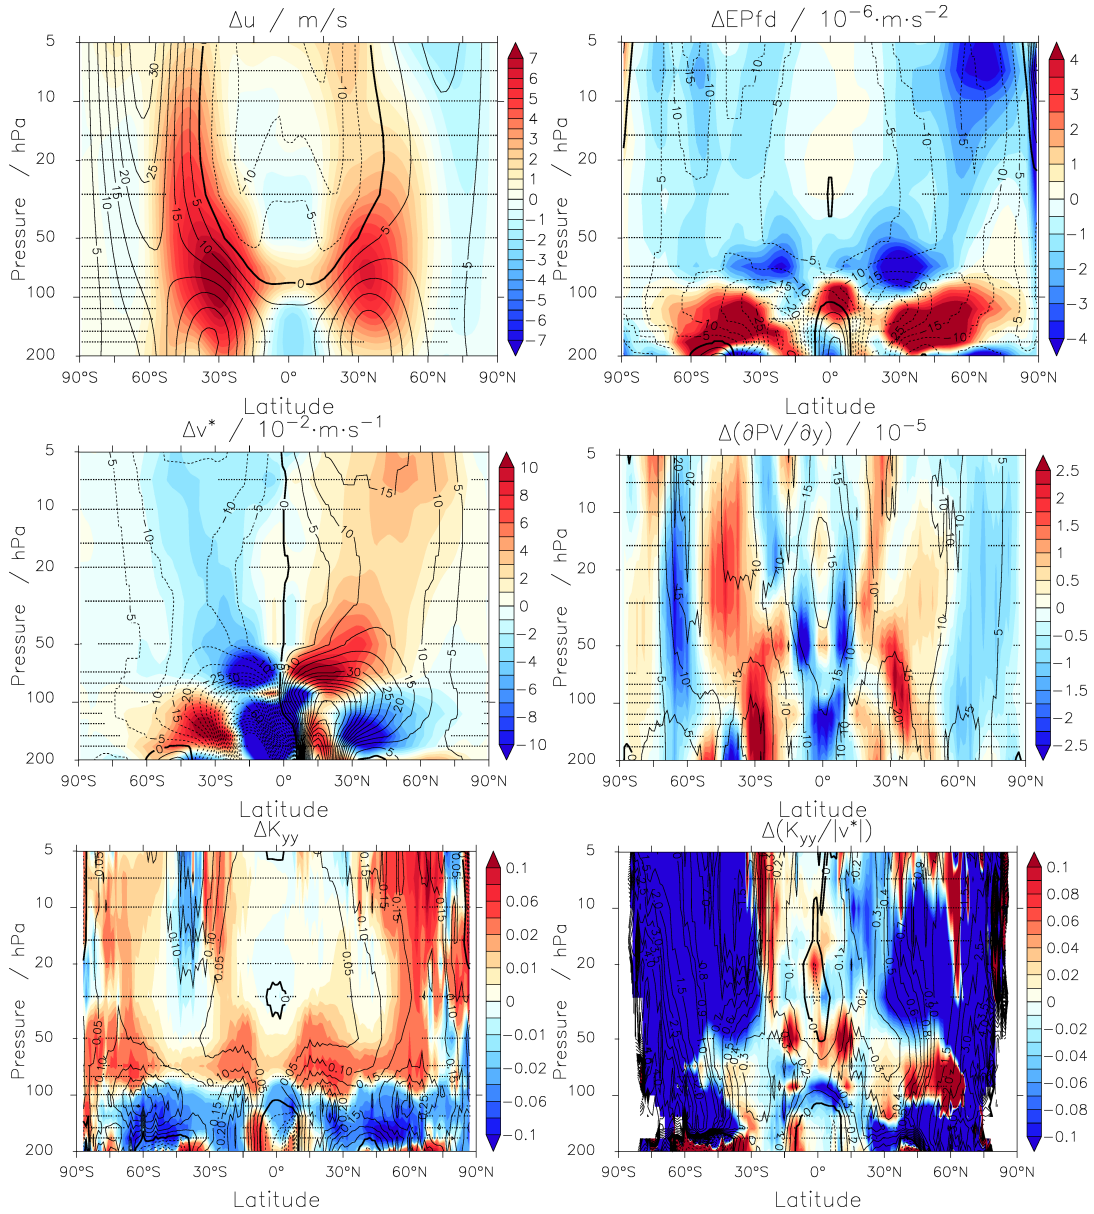

**Figure 3.** EMAC-L47 CCM1 REF-C2 model simulation differences ( $\Delta$ ) of (a) the zonal wind  $\bar{u}$ , (b) the EP flux divergence, (c) the meridional residual circulation  $v^*$ , (d) the meridional PV-gradient ( $\partial PV/\partial y$ ), (e) the diffusivity coefficient  $K_{yy}$  and (f) the ratio  $K_{yy}/|v^*|$  between the periods 1970-1990 and 2080-2100. The contour lines show the multi-model mean climatology of the first period of the respective quantity. Stippled regions show where the statistical significance of the difference is below the threshold 95%.

# EMAC-L90

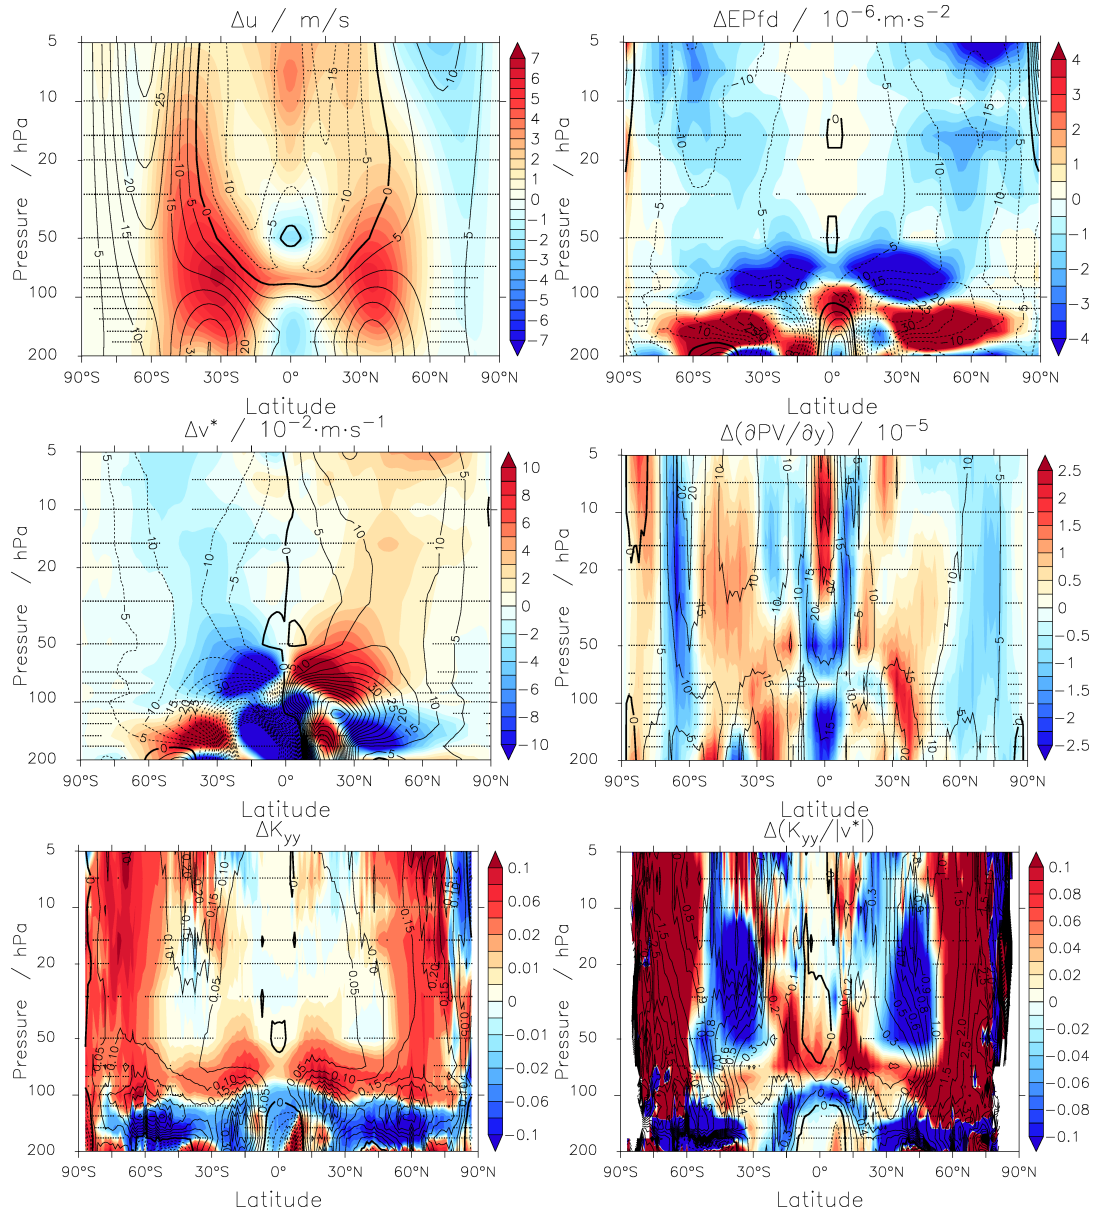

**Figure 4.** EMAC-L90 CCM1 REF-C2 model simulation differences ( $\Delta$ ) of (a) the zonal wind  $\bar{u}$ , (b) the EP flux divergence, (c) the meridional residual circulation  $v^*$ , (d) the meridional PV-gradient ( $\partial PV/\partial y$ ), (e) the diffusivity coefficient  $K_{yy}$  and (f) the ratio  $K_{yy}/|v^*|$  between the periods 1970-1990 and 2080-2100. The contour lines show the multi-model mean climatology of the first period of the respective quantity. Stippled regions show where the statistical significance of the difference is below the threshold 95%.

# GEOSCCM

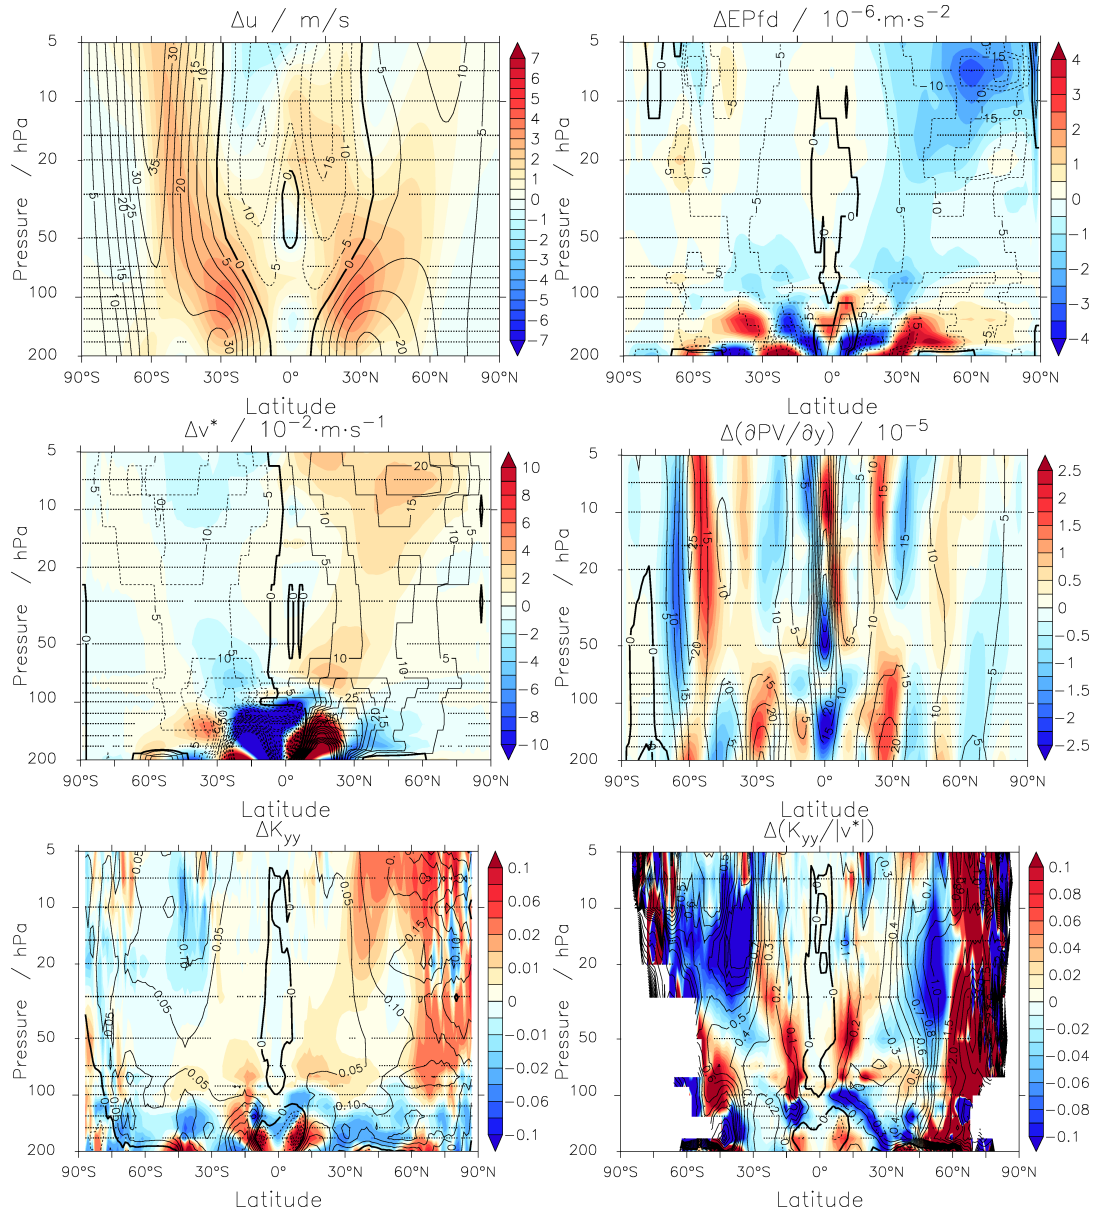

**Figure 5.** GEOSCCM CCM1 REF-C2 model simulation differences ( $\Delta$ ) of (a) the zonal wind  $\bar{u}$ , (b) the EP flux divergence, (c) the meridional residual circulation  $v^*$ , (d) the meridional PV-gradient ( $\partial PV/\partial y$ ), (e) the diffusivity coefficient  $K_{yy}$  and (f) the ratio  $K_{yy}/|v^*|$  between the periods 1970-1990 and 2080-2100. The contour lines show the multi-model mean climatology of the first period of the respective quantity. Stippled regions show where the statistical significance of the difference is below the threshold 95%.

# MRI

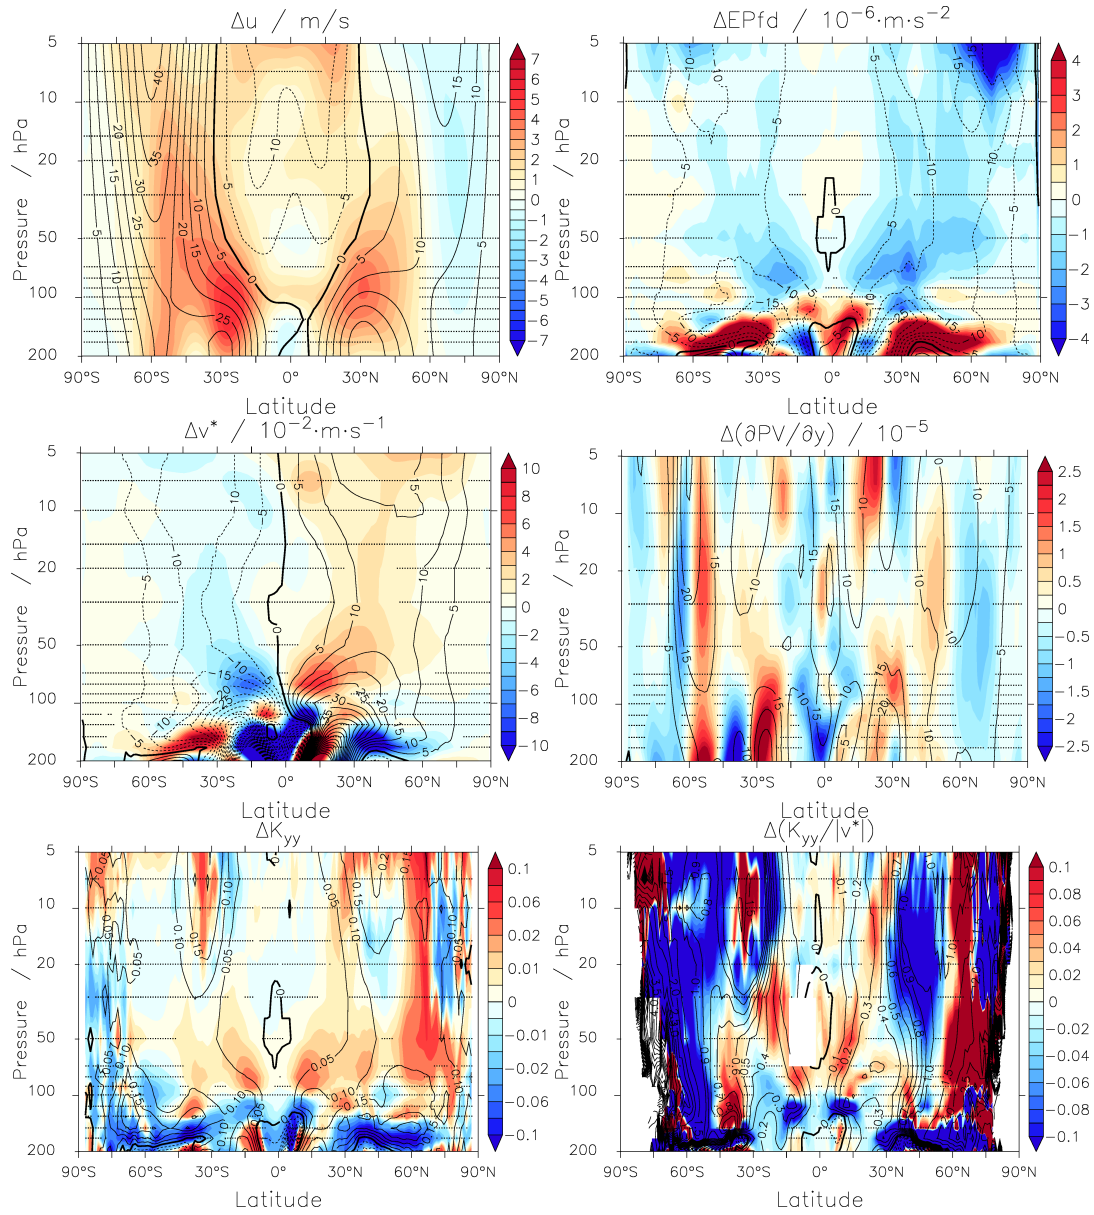

**Figure 6.** MRI CCM1 REF-C2 model simulation differences ( $\Delta$ ) of (a) the zonal wind  $\bar{u}$ , (b) the EP flux divergence, (c) the meridional residual circulation  $v^*$ , (d) the meridional PV-gradient ( $\partial PV/\partial y$ ), (e) the diffusivity coefficient  $K_{yy}$  and (f) the ratio  $K_{yy}/|v^*|$  between the periods 1970-1990 and 2080-2100. The contour lines show the multi-model mean climatology of the first period of the respective quantity. Stippled regions show where the statistical significance of the difference is below the threshold 95%.



# NIWA-UKCA

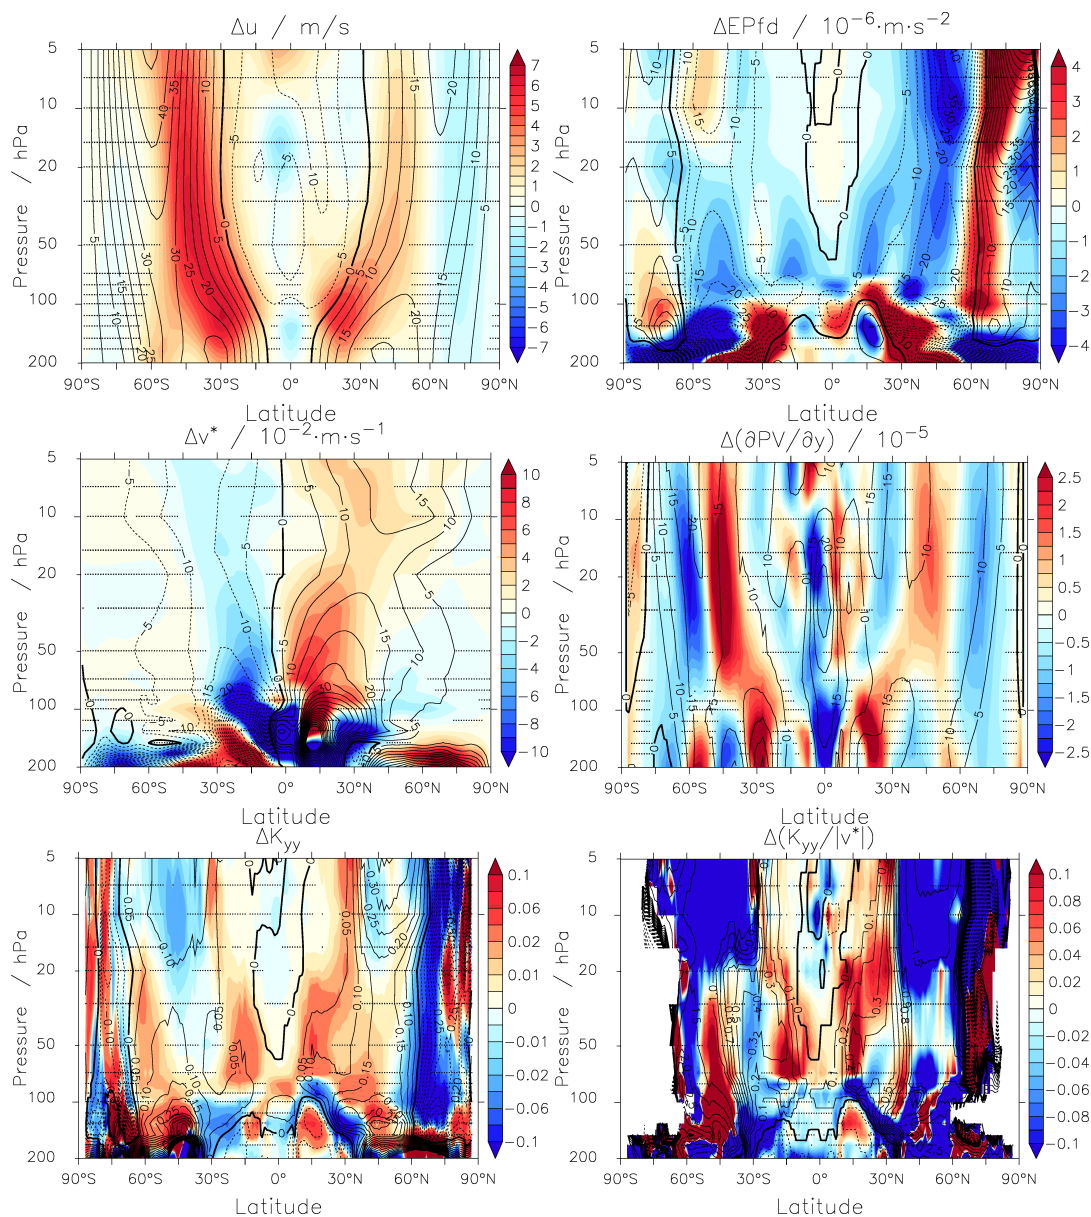

**Figure 7.** NIWA-UKCA CCM1 REF-C2 model simulation differences ( $\Delta$ ) of (a) the zonal wind  $\bar{u}$ , (b) the EP flux divergence, (c) the meridional residual circulation  $v^*$ , (d) the meridional PV-gradient ( $\partial PV/\partial y$ ), (e) the diffusivity coefficient  $K_{yy}$  and (f) the ratio  $K_{yy}/|v^*|$  between the periods 1970-1990 and 2080-2100. The contour lines show the multi-model mean climatology of the first period of the respective quantity. Stippled regions show where the statistical significance of the difference is below the threshold 95%.

# WACCM

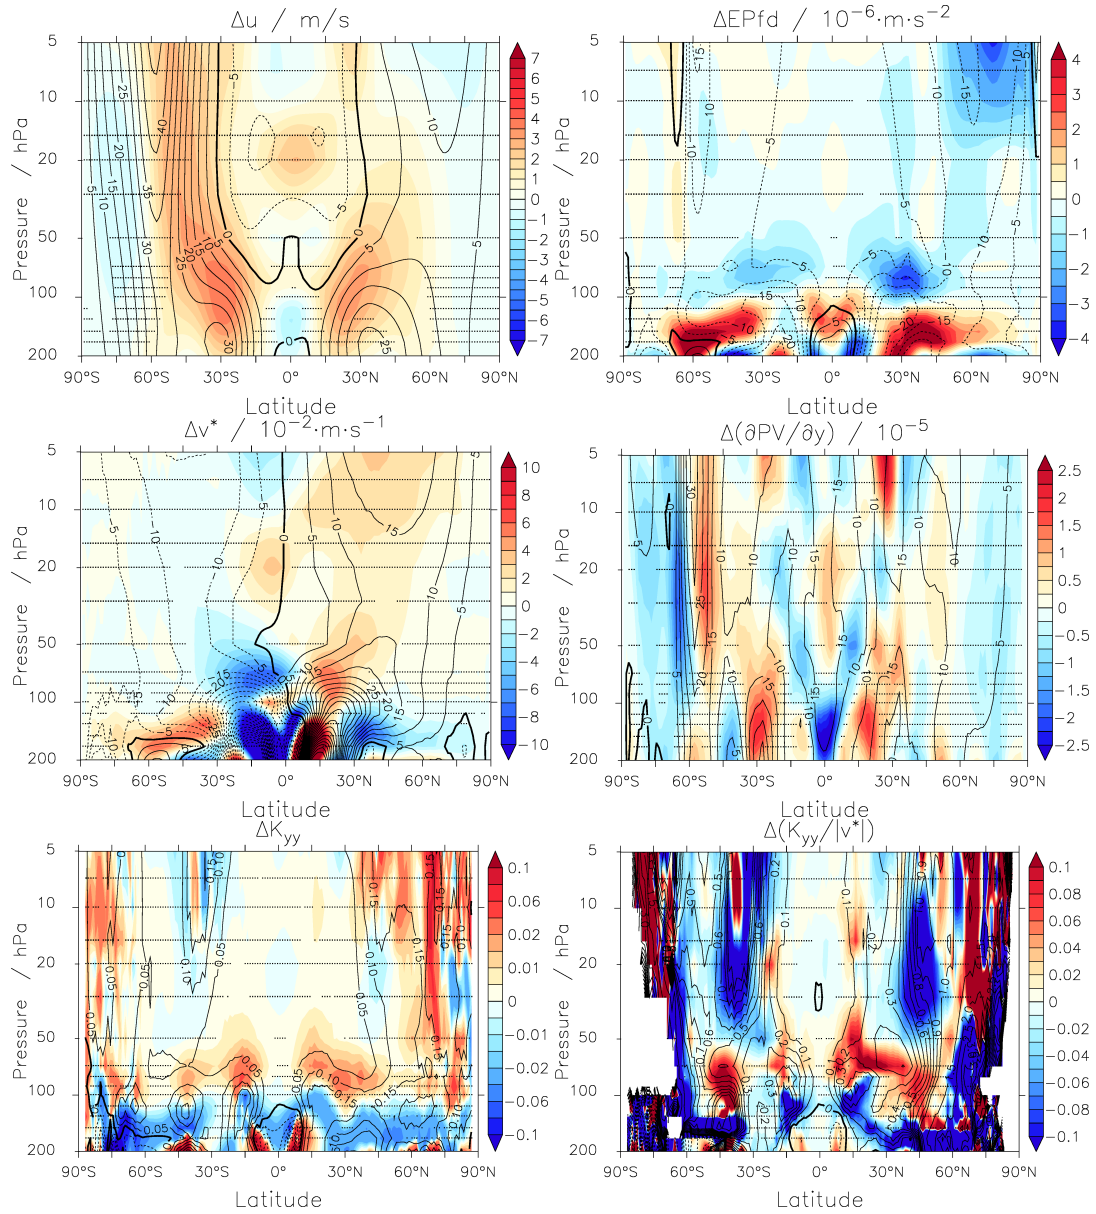

**Figure 8.** WACCM CCM1 REF-C2 model simulation differences ( $\Delta$ ) of (a) the zonal wind  $\bar{u}$ , (b) the EP flux divergence, (c) the meridional residual circulation  $v^*$ , (d) the meridional PV-gradient ( $\partial PV / \partial y$ ), (e) the diffusivity coefficient  $K_{yy}$  and (f) the ratio  $K_{yy} / |v^*|$  between the periods 1970-1990 and 2080-2100. The contour lines show the multi-model mean climatology of the first period of the respective quantity. Stippled regions show where the statistical significance of the difference is below the threshold 95%.
